# Supplementary material for: Characterisation of a Complex CaZr0.9Ce0.1Ti2O7 Glass–Ceramic Produced by Hot Isostatic Pressing
Source: MDPI journal article supplement (doi:10.3390/ceramics5040074), 2022-11-19
Supplement: s1 [file s1]

## Supplementary Information

# Characterisation of a complex $\text{CaZr}_{0.9}\text{Ce}_{0.1}\text{Ti}_2\text{O}_7$ glass-ceramic produced by Hot Isostatic Pressing

Malin C. J. Dixon Wilkins<sup>1</sup>, Cl  mence Gausse<sup>1</sup>, Luke T. Townsend<sup>1</sup>, Laura J. Gardner<sup>1</sup> and Claire L. Corkhill<sup>1,\*</sup>

<sup>1</sup> NucleUS Immobilisation Science Laboratory, Department of Materials Science and Engineering, University of Sheffield, Sheffield, U.K.

\* Correspondence: c.corkhill@sheffield.ac.uk (C.C.)

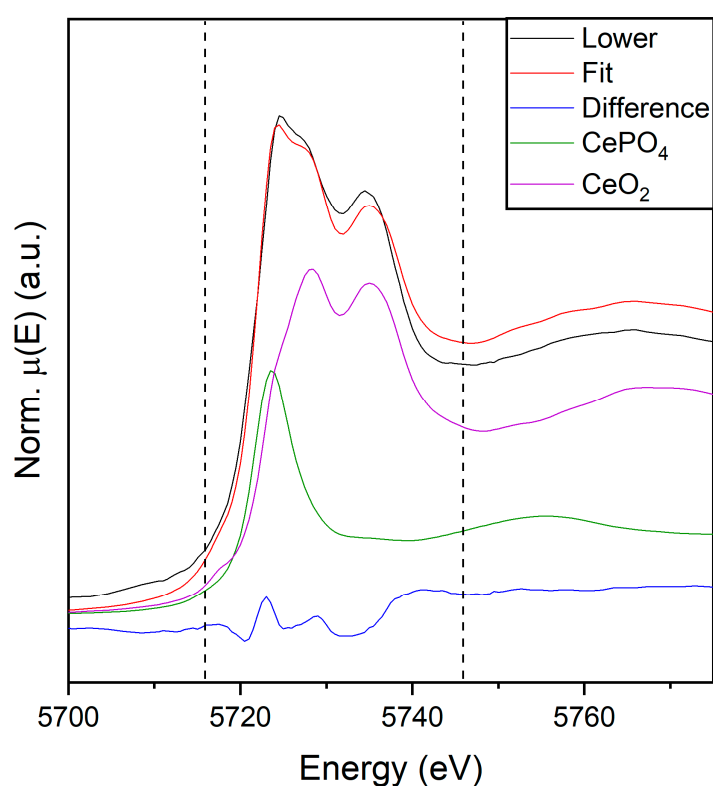

**Supplementary Figure S1:** Linear combination fit of the Ce L<sub>3</sub>-edge XANES spectrum of the lower region of a HIPed glass-ceramic targeting 30 wt.%  $\text{CaZr}_{0.9}\text{Ce}_{0.1}\text{Ti}_2\text{O}_7$  in 70 wt.%  $\text{Na}_2\text{Al}_2\text{Si}_6\text{O}_{16}$  glass. The calculated Ce oxidation state was 3.7(1) and the fit R factor was 0.0187.

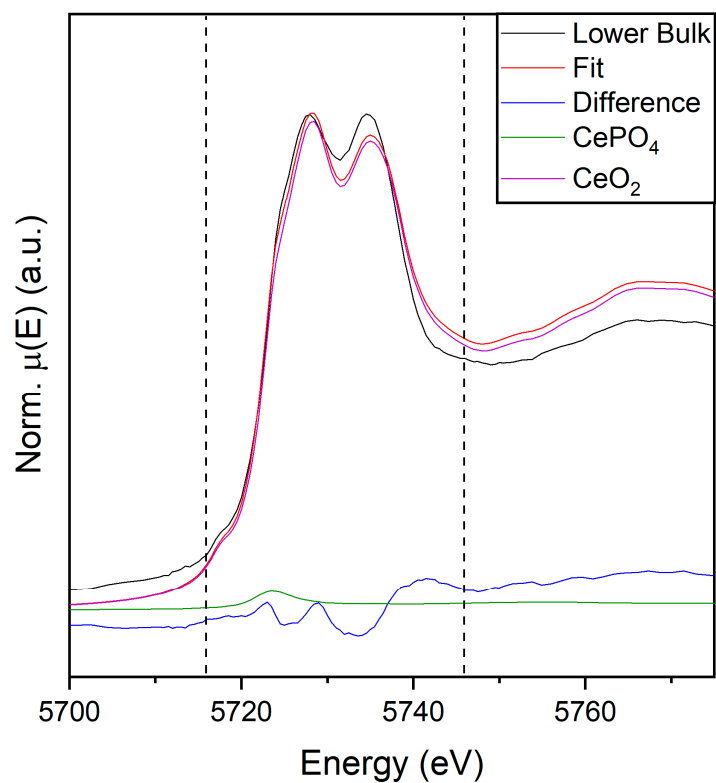

**Supplementary Figure S2:** Linear combination fit of the Ce L<sub>3</sub>-edge XANES spectrum of the lower bulk region of a HIPed glass-ceramic targeting 30 wt.% CaZr<sub>0.9</sub>Ce<sub>0.1</sub>Ti<sub>2</sub>O<sub>7</sub> in 70 wt.% Na<sub>2</sub>Al<sub>2</sub>Si<sub>6</sub>O<sub>16</sub> glass. The calculated Ce oxidation state was 4.0(1)+, and the fit R factor was 0.0149.

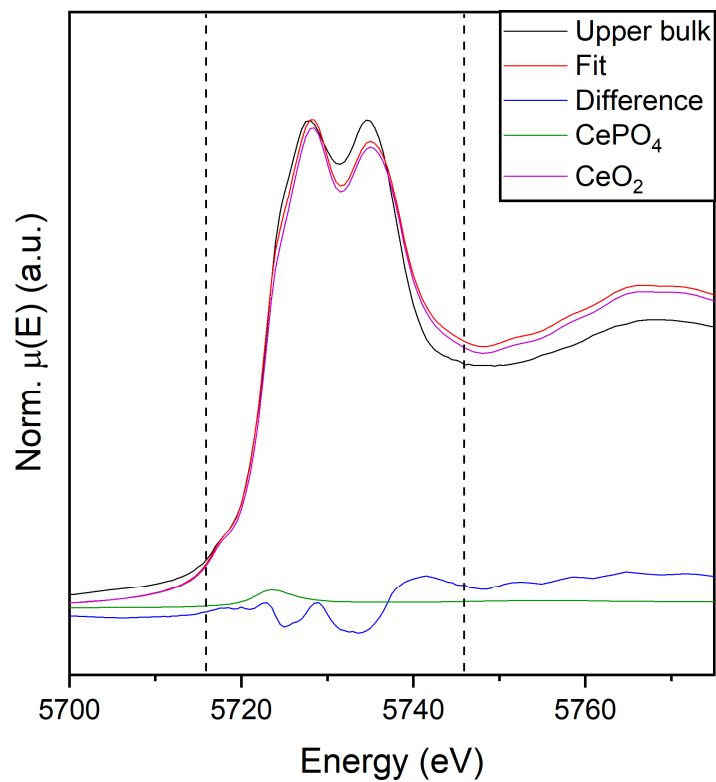

**Supplementary Figure S3:** Linear combination fit of the Ce L<sub>3</sub>-edge XANES spectrum of the upper bulk region of a HIPed glass-ceramic targeting 30 wt.% CaZr<sub>0.9</sub>Ce<sub>0.1</sub>Ti<sub>2</sub>O<sub>7</sub> in 70 wt.% Na<sub>2</sub>Al<sub>2</sub>Si<sub>6</sub>O<sub>16</sub> glass. The calculated Ce oxidation state was 4.0(1)+, and the fit R factor was 0.0154.

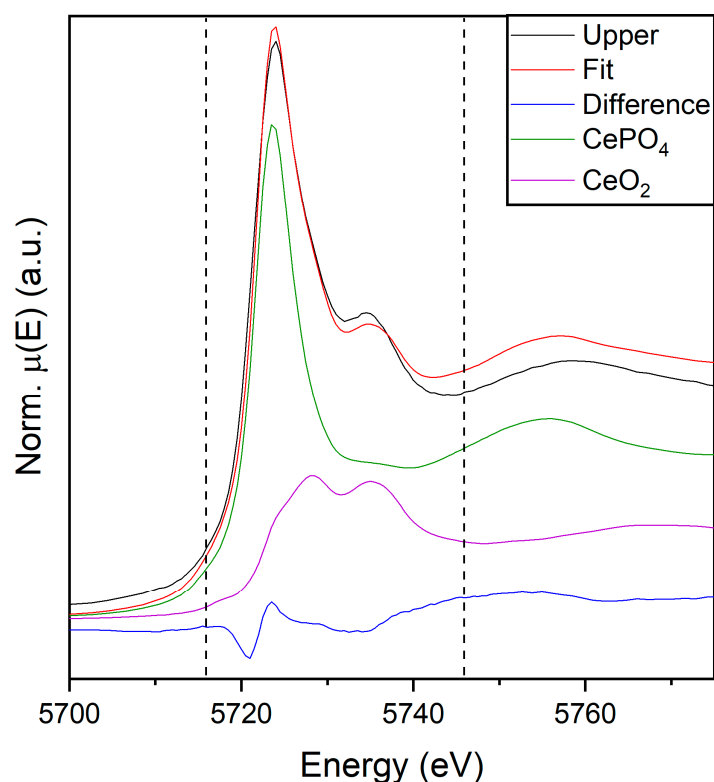

**Supplementary Figure S4:** Linear combination fit of the Ce L<sub>3</sub>-edge XANES spectrum of the upper region of a HIPed glass-ceramic targeting 30 wt.% CaZr<sub>0.9</sub>Ce<sub>0.1</sub>Ti<sub>2</sub>O<sub>7</sub> in 70 wt.% Na<sub>2</sub>Al<sub>2</sub>Si<sub>6</sub>O<sub>16</sub> glass. The calculated Ce oxidation state was 3.3(1)+, and the fit R factor was 0.0127.

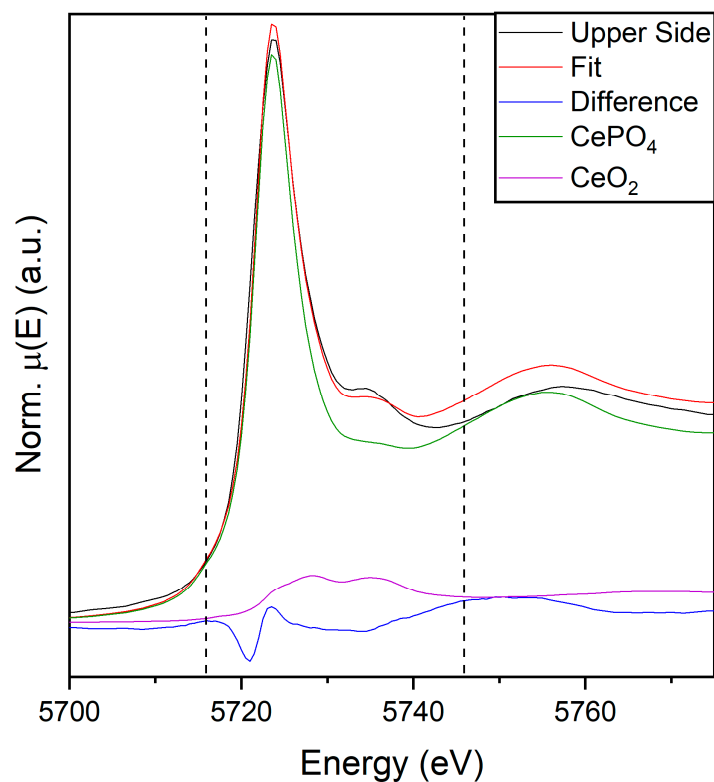

**Supplementary Figure S5:** Linear combination fit of the Ce L<sub>3</sub>-edge XANES spectrum of the upper side region of a HIPed glass-ceramic targeting 30 wt.% CaZr<sub>0.9</sub>Ce<sub>0.1</sub>Ti<sub>2</sub>O<sub>7</sub> in 70 wt.% Na<sub>2</sub>Al<sub>2</sub>Si<sub>6</sub>O<sub>16</sub> glass. The calculated Ce oxidation state was 3.1(1)+, and the fit R factor was 0.0095.

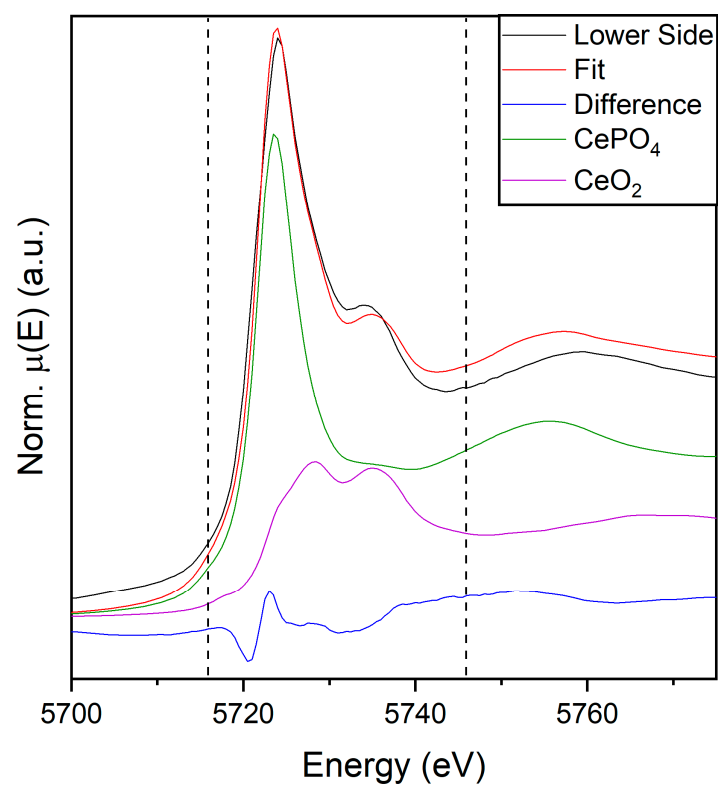

**Supplementary Figure S6:** Linear combination fit of the Ce L<sub>3</sub>-edge XANES spectrum of the lower side region of a HIPed glass-ceramic targeting 30 wt.% CaZr<sub>0.9</sub>Ce<sub>0.1</sub>Ti<sub>2</sub>O<sub>7</sub> in 70 wt.% Na<sub>2</sub>Al<sub>2</sub>Si<sub>6</sub>O<sub>16</sub> glass. The calculated Ce oxidation state was 3.4(1)<sup>+</sup>, and the fit R factor was 0.0182.
