# Supplementary material for: Characterisation of a Complex CaZr0.9Ce0.1Ti2O7 Glass–Ceramic Produced by Hot Isostatic Pressing
Source: MDPI journal article supplement (doi:10.3390/ceramics5040074), 2022-11-19
Supplement: s1 [file s1]

Archive with 1 entries (1 files):
- ceramics-1990794-supplementary.pdf
